# Supplementary material for: Community-Based Exercise and Lifestyle Program Improves Health Outcomes in Older Adults with Type 2 Diabetes
Source: MDPI journal article supplement (doi:10.3390/ijerph18116147), 2021-06-07
Supplement: s1 [file s1]

**Supplementary Table 1.** Changes in DASS scores from baseline and post-program

|            | n  | Baseline<br>mean (SD) | 8 weeks<br>mean (SD) | Pre - Post<br>mean (95% CI) | p value |
|------------|----|-----------------------|----------------------|-----------------------------|---------|
| Depression | 86 | 6.3 (7.1)             | 4.4 (5.4)            | 1.9 (0.7 – 3.0)             | 0.003   |
| Anxiety    | 86 | 4.8 (5.6)             | 3.8 (5.1)            | 1.0 (0.1 – 1.9)             | 0.026   |
| Stress     | 86 | 8.3 (7.0)             | 6.2 (5.6)            | 2.1 (1.0 – 3.3)             | 0.001   |
